# Supplementary material for: MicroRNA‐mediated metabolic reprogramming of chimeric antigen receptor T cells
Source: PubMed Central journal article supplement — Immunol Cell Biol. 2022 May 4;100(6):424–39. doi: 10.1111/imcb.12551 (PMC9322280; doi:10.1111/imcb.12551), 2022-05-04
Supplement: IMCB-100-424-s001.pdf [file IMCB-100-424-s001.pdf]

List of miRNAs with at least one gene in each gene group.

|                          | miRNA (Target gene)                                                                                                                                                                                                                                                                                                                                                                                                                                                                                                                                                                                                                                                                                                                                                                                                                                                                                                                                                                                                                                                                                                                                                                                                                                                                                                                                                                                                                                                                                                                                                                                                                                                                                                                                                                                                                                                                                                                                                                                                                                  |
|--------------------------|------------------------------------------------------------------------------------------------------------------------------------------------------------------------------------------------------------------------------------------------------------------------------------------------------------------------------------------------------------------------------------------------------------------------------------------------------------------------------------------------------------------------------------------------------------------------------------------------------------------------------------------------------------------------------------------------------------------------------------------------------------------------------------------------------------------------------------------------------------------------------------------------------------------------------------------------------------------------------------------------------------------------------------------------------------------------------------------------------------------------------------------------------------------------------------------------------------------------------------------------------------------------------------------------------------------------------------------------------------------------------------------------------------------------------------------------------------------------------------------------------------------------------------------------------------------------------------------------------------------------------------------------------------------------------------------------------------------------------------------------------------------------------------------------------------------------------------------------------------------------------------------------------------------------------------------------------------------------------------------------------------------------------------------------------|
| Glucose Uptake Receptors | <b>miR22</b> (Glut1), <b>miR140</b> (Glut1, SGLT1), <b>miR505</b> (SGLT1), <b>miR454</b> (Glut1), <b>miR130a</b> (Glut1), <b>miR130b</b> (Glut1), <b>miR301a</b> (Glut1), <b>miR301b</b> (Glut1), <b>miR148a</b> (Glut1, 3), <b>miR148b</b> (Glut1, 2), <b>miR152</b> (Glut1/3), <b>miR330*</b> (Glut1), <b>let-7a</b> (Glut1), <b>let-7b*</b> (Glut1), <b>let-7c</b> (Glut1), <b>let-7f</b> (Glut1), <b>let-7g*</b> (Glut1), <b>let-7i</b> (Glut1), <b>miR98</b> (Glut1), <b>miR3065</b> (Glut1), <b>miR30d</b> (Glut4), <b>miR34a*</b> (Glut1), <b>miR449a</b> (Glut1), <b>miR484*</b> (Glut1, 4), <b>miR522</b> (Glut1), <b>miR424</b> (Glut3), <b>miR15a*</b> (Glut3), <b>miR15b</b> (Glut3), <b>miR16*</b> (Glut3), <b>miR103*</b> (Glut3, 8), <b>miR107*</b> (Glut3, 8), <b>miR195</b> (Glut3), <b>miR17</b> (Glut1, 3, 4, 8), <b>miR20a*</b> (Glut4/8), <b>miR92a*</b> (Glut3, 4, 6), <b>miR32</b> (Glut3), <b>miR26a</b> (Glut3), <b>miR378a*</b> (Glut3), <b>miR387c*</b> (Glut3), <b>miR181a*</b> (Glut3), <b>miR542*</b> (Glut3), <b>miR29a</b> (Glut3), <b>miR29b</b> (Glut3), <b>miR29c</b> (Glut3), <b>miR146a*</b> (Glut3), <b>miR146b</b> (Glut3), <b>miR520</b> (Glut4), <b>miR106a*</b> (Glut3, 4, 8), <b>miR20a</b> (Glut4, 6), <b>miR93*</b> (Glut4, 8), <b>miR526b</b> (Glut4, 8), <b>miR31</b> (Glut4), <b>miR204*</b> (SGLT1), <b>miR27a</b> (Glut4), <b>miR548</b> (Glut1), <b>miR149</b> (Glut8), <b>miR186</b> (Glut3), <b>miR185</b> (Glut3), <b>miR124</b> (Glut1)                                                                                                                                                                                                                                                                                                                                                                                                                                                                                                                                                       |
| Glycolysis Enzymes       | <b>miR22</b> (HK1, TPI1, PGK1, ENO1 & PKM), <b>miR140</b> (PFKM & GAPDH), <b>miR505</b> (PGK1 & PGAM1), <b>miR454</b> (ALDOA), <b>miR130a</b> (ALDOA & PGK1), <b>miR130b</b> (ALDOA), <b>miR301a</b> (ALDOA & ENO1), <b>miR301b</b> (ALDOA), <b>miR148a</b> (GPI, ALDOA, PGAM1 & PKM), <b>miR148b</b> (GPI, PFKM, ALDOA, PGAM1 & ENO1), <b>miR152</b> (ALDOA), <b>miR330*</b> (HK1, 2, GPI & PKM), <b>let-7a</b> (HK2, ALDOA & ENO1), <b>let-7b*</b> (HK2, ALDOA, GAPDH & ENO1), <b>let-7c</b> (HK2, ALDOA & ENO1), <b>let-7f</b> (HK2, ALDOA & ENO1), <b>let-7g*</b> (HK2, GPI, ALDOA & ENO1), <b>let-7i</b> (HK2, ALDOA & ENO1), <b>miR98</b> (GPI, ALDOA & ENO1), <b>miR3065</b> (PGK1), <b>miR30d</b> (TPI1 & ENO1), <b>miR34a*</b> (HK1, ALDOA, GAPDH & ENO1), <b>miR449a</b> (HK1, ALDOA, GAPDH & ENO1), <b>miR484*</b> (GAPDH, PGK1 & PKM), <b>miR522</b> (GPI & PKM), <b>miR424</b> (HK1, PFKM, ALDOA & PKM), <b>miR15a*</b> (HK1, ALDOA & PKM), <b>miR15b</b> (HK1, ALDOA & PKM), <b>miR16*</b> (HK1, ALDOA, PGK1 & PKM), <b>miR103*</b> (HK1, GPI, ALDOA, PGK1 & ENO1), <b>miR107*</b> (HK1, GPI, ALDOA, PGK1 & ENO1), <b>miR195</b> (HK1, ALDOA & PKM), <b>miR17</b> (HK1, GPI, PFKM, ALDOA, PGK1, PGAM1 & ENO1), <b>miR20a*</b> (PGK1 & ENO1), <b>miR92a*</b> (ALDOA, PGAM1, ENO1 & PKM), <b>miR32</b> (PGAM1), <b>miR26a</b> (TPI1, GAPDH & PGK1), <b>miR378a*</b> (ALDOA, PGK1, ENO1 & PKM), <b>miR387c*</b> (PGK1), <b>miR181a*</b> (HK1, GPI, GAPDH, PGK1 & ENO1), <b>miR542*</b> (PFKM, GAPDH & PGK1), <b>miR29a</b> (GPI & PFKM), <b>miR29b</b> (GPI, PFKM & PGK1), <b>miR29c</b> (GPI & PFKM), <b>miR146a*</b> (PGK1), <b>miR146b</b> (ALDOA & PGK1), <b>miR520</b> (HK1), <b>miR106a*</b> (HK1, ENO1), <b>miR20a</b> (ENO1), <b>miR93*</b> (GPI, PGAM1 & ENO1), <b>miR526b</b> (PKM), <b>miR31</b> (ENO1), <b>miR204*</b> (TPI1), <b>miR27a</b> (GPI, ALDOA, GAPDH, PGK1 & PKM), <b>miR548</b> (PFKM & PGK1), <b>miR149</b> (GAPDH, PGK1 & ENO1), <b>miR186</b> (PFKM & GAPDH), <b>miR185</b> (GAPDH & PKM), <b>miR124</b> (PKM) |
| Metabolic Regulators     | <b>miR22</b> (mTOR, AMPK, AKT1, MCT4 & HIF1A), <b>miR140</b> (MCT1, 2, 4 & HIF1A), <b>miR505</b> (AKT2 & MCT1), <b>miR454</b> (MCT2 & HIF1A), <b>miR130a</b> (MCT2 & HIF1A), <b>miR130b</b> (AMPK & MCT2), <b>miR301a</b> (LDHA & MCT2), <b>miR301b</b> (LDHA), <b>miR148a</b> , (PI3K, AKT2 & HIF1A), <b>miR148b</b> (AMPK, PI3K & AKT2), <b>miR152</b> (PI3K), <b>miR330*</b> (HIF1A), <b>let-7a</b> (AMPK, AKT2 & MCT4), <b>let-7b*</b> (AMPK, PI3K, AKT2 & MCT4), <b>let-7c</b> (AMPK, AKT2 & MCT4), <b>let-7f</b> (AMPK, AKT2 & MCT4), <b>let-7g*</b> (AMPK, AKT2 & MCT4), <b>let-7i</b> (AMPK, AKT2 & MCT4), <b>miR98</b> (AMPK, AKT2 & MCT4), <b>miR3065</b> (AKT2), <b>miR30d</b> (LDHA, AKT1, AMPK & PI3K), <b>miR34a*</b> (LDHA, PI3K & HIF1A), <b>miR449a</b> (LDHA & PI3K), <b>miR484*</b> (MCT1 & 4), <b>miR522</b> (LDHA & AKT2), <b>miR424</b> (MCT1 & 4), <b>miR15a*</b> (PI3K, AKT1 & 2), <b>miR15b</b> (PI3K & MCT1), <b>miR16*</b> (LDHA, AMPK, PI3K, MCT1, 2, 4 & HIF1A), <b>miR103*</b> (LDHA, ACAT1, AKT2, MCT1 & 4), <b>miR107*</b> (ACAT1, AKT2 & MCT4), <b>miR195</b> (AMPK & PI3K), <b>miR17</b> (AMPK, AKT1, MCT2 & HIF1A), <b>miR20a*</b> (AKT1 & HIF1A), <b>miR92a*</b> (mTOR & PI3K), <b>miR32</b> (LDHA, AMPK, PI3K, AKT2 & HIF1A), <b>miR26a</b> (ACAT2, AMPK & MCT1), <b>miR378a*</b> (LDHA & MCT1), <b>miR387c*</b> (LDHA), <b>miR181a*</b> (AMPK                                                                                                                                                                                                                                                                                                                                                                                                                                                                                                                                                                                                                                                                  |

|                 |                                                                                                                                                                                                                                                                                                                                                                                                                                                                                                                                                                                                                                                                                                                                                                                                                                                                                                                                                                                                                                                                                                                                                                                                                                                                                                                                                                                                                                                                                                                                                                                                                                    |
|-----------------|------------------------------------------------------------------------------------------------------------------------------------------------------------------------------------------------------------------------------------------------------------------------------------------------------------------------------------------------------------------------------------------------------------------------------------------------------------------------------------------------------------------------------------------------------------------------------------------------------------------------------------------------------------------------------------------------------------------------------------------------------------------------------------------------------------------------------------------------------------------------------------------------------------------------------------------------------------------------------------------------------------------------------------------------------------------------------------------------------------------------------------------------------------------------------------------------------------------------------------------------------------------------------------------------------------------------------------------------------------------------------------------------------------------------------------------------------------------------------------------------------------------------------------------------------------------------------------------------------------------------------------|
|                 | <p>&amp; MCT4), <b>miR542*</b> (LDHA &amp; HIF1A), <b>miR29a</b> (PI3K, AKT2, MCT1, 2, 4 &amp; HIF1A), <b>miR29b</b> (PI3K, AKT2, MCT1, 2, 4 &amp; HIF1A), <b>miR29c</b> (PI3K, AKT2, MCT1, 2, 4 &amp; HIF1A), <b>miR146a*</b> (AMPK, AKT2, MCT4 &amp; HIF1A), <b>miR146b</b> (AMPK, AKT2, MCT4 &amp; HIF1A), <b>miR520</b> (LDHA &amp; AKT1), <b>miR106a*</b> (MCT1 &amp; HIF1A), <b>miR20a</b> (HIF1A), <b>miR93*</b> (AMPK &amp; HIF1A), <b>miR526b</b> (HIF1A), <b>miR31</b> (HIF1A), <b>miR204*</b> (LDHA &amp; mTOR), <b>miR27a</b> (AMPK, PI3K, AKT1, MCT1, 2 &amp; HIF1A), <b>miR548</b> (AKT1, 2 &amp; HIF1A), <b>miR149</b> (mTOR &amp; AKT1), <b>miR186</b> (PI3K, AKT1, MCT1, 2 &amp; HIF1A), <b>miR185</b> (AKT2 &amp; MCT1), <b>miR124</b> (PI3K, AKT1, 2 &amp; MCT1)</p>                                                                                                                                                                                                                                                                                                                                                                                                                                                                                                                                                                                                                                                                                                                                                                                                                                            |
| Fission Factors | <p><b>miR22</b> (DNM2), <b>miR140</b> (Drp1 &amp; DNM2), <b>miR505</b> (Drp1), <b>miR454</b> (DNM2), <b>miR130a</b> (DNM2), <b>miR130b</b> (DNM2), <b>miR301a</b> (Drp1 &amp; DNM2), <b>miR301b</b> (Drp1 &amp; DNM2), <b>miR148a</b> (MFF), <b>miR148b</b> (MFF), <b>miR152</b> (MFF), <b>miR330*</b> (MID51), <b>let-7a</b> (MID51 &amp; DNM2), <b>let-7b*</b> (MID51 &amp; DNM2), <b>let-7c</b> (MID51 &amp; DNM2), <b>let-7f</b> (MID51), <b>let-7g*</b> (MID51), <b>let-7i</b> (MID51), <b>miR98</b> (MID51), <b>miR3065</b> (MID51), <b>miR30d</b> (Drp1, MFF, MID51 &amp; DNM2), <b>miR34a*</b> (Drp1), <b>miR449a</b> (Drp1), <b>miR484*</b> (FIS1), <b>miR522</b> (MID51 &amp; DNM2), <b>miR424</b> (FIS1), <b>miR15a*</b> (Drp1, FIS1 &amp; DNM2), <b>miR15b</b> (Drp1), <b>miR16*</b> (Drp1), <b>miR103*</b> (Drp1 &amp; MID51), <b>miR107*</b> (MID51 &amp; DNM2), <b>miR195</b> (Drp1), <b>miR17</b> (Drp1 &amp; DNM2), <b>miR20a*</b> (Drp1 &amp; DNM2), <b>miR92a*</b> (MFF &amp; MID49), <b>miR32</b> (MFF), <b>miR26a</b> (MFF &amp; MID51), <b>miR378a*</b> (DNM2), <b>miR387c*</b> (DNM2), <b>miR181a*</b> (Drp1), <b>miR542*</b> (MFF), <b>miR29a</b> (MID51), <b>miR29b</b> (MID51), <b>miR29c</b> (MID51), <b>miR146a*</b> (DNM2), <b>miR146b</b> (DNM2), <b>miR520</b> (DNM2), <b>miR106a*</b> (Drp1 &amp; DNM2), <b>miR20a</b> (DNM2), <b>miR93*</b> (Drp1 &amp; DNM2), <b>miR526b</b> (DNM2), <b>miR31</b> (MID51), <b>miR204*</b> (DNM2), <b>miR27a</b> (DNM2), <b>miR548</b> (DNM2), <b>miR149</b> (MID51 &amp; DNM2), <b>miR186</b> (FIS1), <b>miR185</b> (FIS1 &amp; MID51), <b>miR124</b> (DNM2)</p> |

\* Indicates mitomiRs.
